# Supplementary material
Source: PubMed Central journal article supplement (PMC534716)
Supplement: pnas_101_48_16970__5.pdf [file pnas_101_48_16970__5.pdf]

Gill Kidney Brain Heart Muscle Liver Intestine

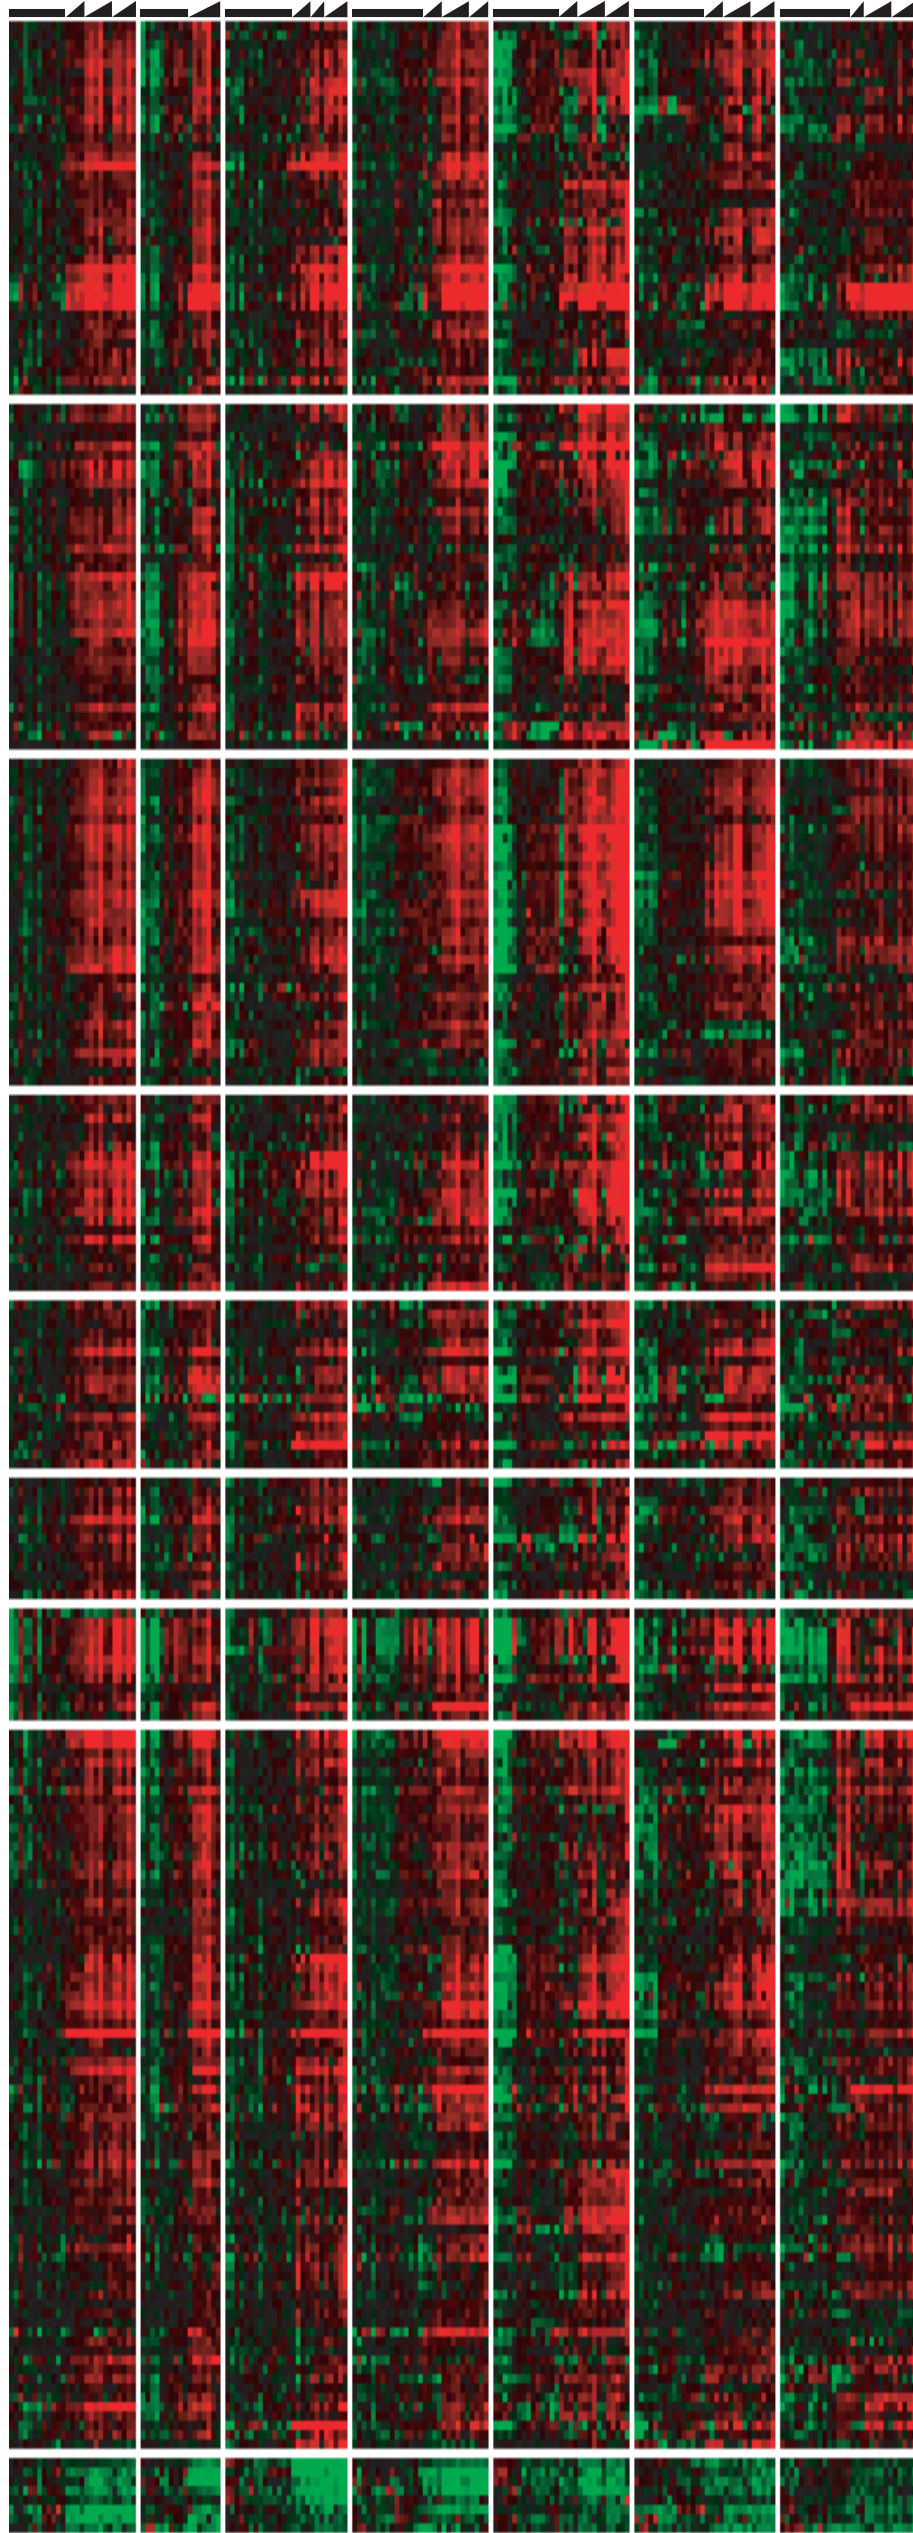

2622 Small nuclear ribonucleoprotein Sm D3 (snRNP core protein D3) 3e-50  
2713 U2 small nuclear ribonucleoprotein A2 (snRNP-A2) 2e-90  
7071 PRE-MRNA SPLICING FACTOR P99 6e-54  
2821 Eukaryotic translation initiation factor 2 subunit 2 (Eukaryotic 2e-34  
2822 Eukaryotic translation initiation factor 2 subunit 2 (Eukaryotic 1e-27  
19a01 NIP2-like protein 1 (High mobility group-like nuclear protein 2 3e-50  
17m20 60S ribosome subunit biogenesis protein NIP7 4e-51  
2021 Splicing factor 2A subunit 2 (Spliceosome associated protein 62) 6e-30  
11a06 Nuclear RNA helicase II (Nuclear RNA helicase Gu) (RH II) (G) 1e-96  
2016 Heterogeneous nuclear ribonucleoprotein G (hnRNP G) (Glycoprotein 5e-68  
326-1 CARO-binding factor A (CBF-A) 3e-84  
102-1 SET protein (HLA-DR associated protein 8) (PHAP8) (Phosphatase 2A 7e-76  
607-1 Splicing factor, arginine/serine-rich 3 (Pre-mRNA splicing factor 2e-38  
874-1 HIGH MOBILITY GROUP 1 PROTEIN (HMG-1) (HMG-1) (HMG-1) 2e-74  
127-1 High mobility group protein 4 (HMG-4) (high mobility group protein 6e-70  
2609 RNA-binding protein EWS (EWS oncogene) (Ewing sarcoma breakpoint 9e-12  
738-3 (NM\_005648) estrogen C, transcription elongation factor B, 1e-21  
88-1 Cytin ACC2-associated protein p19 (RNA polymerase II elongation, 3e-69  
738-1 (NM\_005648) estrogen C, transcription elongation factor B, 1e-21  
30415 Signal recognition particle 54 kDa protein (SRP54) 3e-88  
16134 (NM\_014487) nuclear cysteine-rich protein, zinc finger e-131  
2311 Densin-regulated protein (DRP) 9e-60  
1611 Densin-regulated protein (DRP) 1e-15  
21917 Transcription factor BTF3 (RNA polymerase B transcription factor 3) 1e-58  
699-1 Cellular nuclear acid binding protein (CNBP) 8e-70  
438-1 High mobility group protein 4 (HMG4) (high mobility group protein 3e-68  
699-2 Cellular nuclear acid binding protein (CNBP) 1e-68  
855-2 Cold-inducible RNA-binding protein (Glycine-rich RNA-binding 5e-29  
855-1 Cold-inducible RNA-binding protein (Glycine-rich RNA-binding 1e-28  
300-1 Cold-inducible RNA-binding protein (Glycine-rich RNA-binding 4e-28  
684-1 Eukaryotic translation initiation factor 1A (EIF-1A) (EIF-1A) 3e-51  
2014 Eukaryotic translation initiation factor 2 subunit 1 (Eukaryotic 5e-79  
1201-1 Activated RNA polymerase II transcriptional coactivator 9 (PCA) 2e-35  
21804 SnR associated polypeptide p18 (ZHORO202) 1e-75  
791-1 Protein translation factor SUI1 homolog GCG2 2e-47  
2803 (A020770) putative translation factor [Homo sapiens] 7e-15  
0704 MAX INTERACTING PROTEIN 1 (MXI1 PROTEIN) 1e-28  
16100 HISTONE H3A (H3A) (H1-SA) 4e-15  
1189-1 Mothers against decapentaplegic homolog 6 (SMAD 6) (Mothers against e-103  
539-1 ADP-ATP carrier protein, fibroblast isoform (ADP/ATP translocase 2) e-152  
539-2 ADP-ATP carrier protein, isoform T2 (ADP/ATP translocase 3) 9e-77  
1474-1 Electron transfer flavoprotein beta-subunit (Beta-ETF) 2e-83  
312-1 Succinate dehydrogenase [ubiquinone] cytochrome B small subunit, 1e-40  
0482-1 Cytochrome c, iso-1 and iso-2 4e-42  
6-1 Hypothetical oxidoreductase y00d 9e-12  
590-1 ATP-binding cassette, sub-family F, member 2 (iron inhibited ABC 1e-29  
590-1 ATP-binding cassette, sub-family F, member 2 (iron inhibited ABC e-128  
22005 Protein 14 (ATP binding protein associated with cell 3e-43  
192-1 alpha-ribosyltransferase GTPase-activating factor 1 (GAP 1) 1e-26  
497-1 Vacuolar ATP synthase 16 kDa proteolipid subunit 3e-47  
742-1 Cop-coated vesicle membrane protein p24 precursor (G24A) 2e-13  
728-1 Transmembrane protein Tmp21 precursor (21 kDa Transmembrane 2e-49  
728-2 Transmembrane protein Tmp21 precursor (21 kDa Transmembrane 4e-17  
748-1 Hypothetical protein CG-109 precursor 5e-87  
899-1 Sodium/potassium-transporting ATPase alpha-1 chain precursor (Sodium e-147  
198-1 NPS28 protein homolog e-105  
05912 Electron transfer flavoprotein alpha-subunit, mitochondrial 1e-25  
24-1 ATP synthase alpha chain heart isoform, mitochondrial precursor 0.0  
17415 Phosphate carrier protein, mitochondrial precursor (PF1) 3e-86  
948-1 ATP synthase gamma chain, mitochondrial precursor e-101  
696-1 ATP synthase beta chain, mitochondrial precursor 0.0  
28204 Mitochondrial import receptor subunit TOM20 homolog (Mitochondrial 3e-59  
751-1 ATP synthase lipid-binding protein, mitochondrial precursor (ATP 3e-32  
751-3 ATP synthase lipid-binding protein, mitochondrial precursor (ATP 1e-39  
16e05 ATP synthase delta chain, mitochondrial precursor 1e-55  
729-1 Cytochrome c1, heme protein, mitochondrial precursor (Cytochrome 2e-75  
896-1 Ubiquinol-cytochrome c reductase complex core protein L, 9e-75  
19618 NADH-ubiquinone oxidoreductase 69 kDa subunit (Complex I) 1e-128  
28203 NADH-ubiquinone oxidoreductase 75 kDa subunit, mitochondrial e-126  
1184-1 COATOMER EPILON SUBUNIT (EPILON-COAT PROTEIN) (EPILON-COP) e-123  
1034-1 Membrane associated progesterone receptor component 1 (mPR) 9e-60  
1216 Cytochrome c oxidase polypeptide VII (VII) 8e-37  
295-1 Vacuolar ATP synthase subunit G1 (V1-ATPase G subunit 1) (Vacuolar 8e-26  
0519 Cytochrome c oxidase polypeptide VIb (AED) 2e-30  
11142 NADH-ubiquinone oxidoreductase chain 3e-43  
409-2 APOLOPROTEIN A1 PRECURSOR (APO-A1) 2e-34  
977-1 Proteasome subunit beta type 1-A (20S proteasome beta 6 subunit A) e-132  
919-1 Proteasome subunit beta type 3 (Proteasome theta chain) (Proteasome 2e-97  
599-1 Proteasome subunit alpha type 1 (Proteasome component C1) 3e-81  
14607 Proteasome subunit alpha type 2 5e-22  
748-1 Proteasome subunit alpha type 5 (Proteasome zeta chain) (Macropain 2e-81  
1148-1 Proteasome subunit alpha type 5 (Proteasome zeta chain) (Macropain 3e-87  
919-2 Proteasome subunit beta type 3 (Proteasome theta chain) (Proteasome e-105  
276-1 26S PROTEASE REGULATORY SUBUNIT 6A (TAT-BINDING PROTEIN 1) (TBP-1) 1e-77  
214-1 26S proteasome non-ATPase regulatory subunit 8 (26S proteasome 9e-87  
11151-1 26S proteasome non-ATPase regulatory subunit 13 (26S proteasome e-112  
347-1 26S proteasome non-ATPase regulatory subunit 7 (26S proteasome e-105  
486-1 26S proteasome regulatory subunit 8B (MIP224) (MIP27 interacting e-156  
1614 26S proteasome regulatory subunit 8 (Proteasome subunit p8) (26S 5e-88  
205-1 26S proteasome regulatory subunit 4 (26S proteasome 2e-95  
556-1 26S proteasome regulatory subunit 4 (P26A) 3e-59  
288-1 Proteasome subunit beta type 5 precursor (Proteasome chain 1) 1e-61  
288-2 Proteasome subunit beta type 5 precursor (Proteasome epsilon chain 1e-89  
570-1 Proteasome subunit beta type 7 precursor (Proteasome subunit Z) 2e-82  
200-1 26S proteasome non-ATPase regulatory subunit 1 (26S proteasome e-116  
092-1 26S proteasome regulatory subunit 7 (MSE1) protein 6e-98  
726-1 Ornithine decarboxylase antizyme, long isoform (ODC-A-L) 7e-47  
1518 26S proteasome non-ATPase regulatory subunit 2 (26S proteasome 7e-69  
92-1 Ubiquitin-conjugating enzyme E2-17 kDa 1 (Ubiquitin-protein ligase) 3e-79  
736-2 Ornithine decarboxylase antizyme, short isoform (ODC-A-S) 5e-87  
0522 Microsomal signal peptidase 23 kDa subunit (Pase 22 kDa subunit) 3e-73  
875-1 F-box only protein 2 1e-15  
25005 Proteasome subunit alpha type 6 (Proteasome iota chain) (Macropain 7e-75  
471-1 Proteasome subunit alpha type 7 (Proteasome subunit alpha 4) e-125  
1148-2 Proteasome subunit alpha type 5 (Proteasome zeta chain) (Macropain e-128  
2106 Putative aminopeptidase ZK353.6 in chromosome 10 3e-22  
12615 Cathepsin B precursor e-118  
12604 Ubiquitin-conjugating enzyme E2-17 kDa 2 (Ubiquitin-protein ligase) 4e-11  
451-1 Ubiquitin-conjugating enzyme E2-17 kDa 2 (Ubiquitin-protein ligase) 2e-73  
1113 CAAX prenyl protease 1 homolog (Prenyl protease-specific 4e-74  
2023 ATP-dependent CLP protease ATP-binding subunit ClpX-like, 2e-95  
787-1 Microsomal glutathione S-transferase 3 (Microsomal GST-3) 1e-29  
119-2 Threonine-like protein (32 kDa threonine-related protein) 1e-29  
119-1 Threonine-like protein (32 kDa threonine-related protein) 1e-29  
730-2 Stress-70 protein, mitochondrial precursor (75 kDa glucose 3e-97  
11918 T-COMPLEX PROTEIN 1, ETA SUBUNIT (TCP-1-ETA) (CCT-ETA) 4e-79  
2223 T-COMPLEX PROTEIN 1, DELTA SUBUNIT (TCP-1-DELTA) (CCT-DELTA) 1e-39  
1903 T-complex protein 1, epsilon subunit (TCP-1-epsilon) (CCT-epsilon) 2e-56  
506-2 Probable Bax inhibitor 1 (BI-1) 7e-79  
508-1 Probable Bax inhibitor 1 (BI-1) 2e-97  
730-1 Stress-70 protein, mitochondrial precursor (75 kDa glucose regulated 3e-88  
35023 Stress-70 protein, mitochondrial precursor (75 kDa glucose 7e-49  
81-2 15 kDa selenoprotein precursor 2e-56  
02m16 10 kDa heat shock protein, mitochondrial (Hsp10) (10 kDa 6e-42  
846-1 Selenoprotein T 3e-50  
01m07 T-complex protein 1, zeta subunit (TCP-1-zeta) (CCT-zeta) e-112  
351-1 15 kDa selenoprotein precursor 5e-55  
114-1 12.6 kDa FKBP-binding protein (FKBP-12.6) (Pepdylyl-prolyl 4e-11  
25m05 Death-associated protein 1 (DAP-1) 8e-16  
544-1 Glutathione S-transferase mu, 3 (GSTM3) (GST class-mu 3) 5e-19  
283-1 Superoxide dismutase [Mn], mitochondrial precursor 7e-91  
879-1 ISOCITRATE DEHYDROGENASE (NADP) MITOCHONDRIAL PRECURSOR e-148  
727-2 Pyruvate dehydrogenase E1 component alpha subunit, somatic form, 4e-10  
727-1 Pyruvate dehydrogenase E1 component alpha subunit, somatic form, e-108  
631-1 N-sulphoglucosamine sulphohydrolase precursor (Sulfoligosamine e-121  
17187 GALACTOSE-6-EPI-MUTASE PRECURSOR (GALCEASE) (GALACTOSYLCERAMIDASE) 2e-99  
1769-1 Hypothetical oxidoreductase y00d 9e-12  
30-2 Trifunctional enzyme beta subunit, mitochondrial precursor 3e-38  
2910 3-oxoacyl-CoA thiolase, mitochondrial (Beta-ketothiolase) 5e-81  
0221 Histidine ammonia-lyase (HliIase) e-143  
800-1 S-adenosylmethionine synthase, erythroid-specific, mitochondrial e-101  
820-2 MALATE DEHYDROGENASE, CYTOPLASMIC e-122  
820-1 Malate dehydrogenase, cytoplasmic 5e-62  
1075-1 Transaldolase 2e-85  
535-2 Acyl-CoA desaturase (Stearoyl-CoA desaturase) (Fatty acid desaturase) e-125  
21p19 (NM\_125513) N-acetylneuraminate pyruvate lyase [Mus musculus] 4e-11  
533-1 Adenosylhomocysteinase 2 (S-adenosyl-L-homocysteine hydrolase 2) 0.0  
20a06 CDC42 homolog 1e-35  
921-1 GTP-BINDING NUCLEAR PROTEIN RAN e-118  
322-1 Serine/threonine protein phosphatase 2A, catalytic subunit, beta e-117  
02a22 Serine/threonine protein phosphatase 2A, catalytic subunit, beta 5e-50  
456-1 Rans-specific GTPase-activating protein (Ran binding protein 1) 1e-34  
422-1 Ras-related protein Rab-2 1e-60  
275-1 DUAL SPECIFICITY MITOGEN-ACTIVATED PROTEIN KINASE KINASE 1 (MAP 8e-43  
819-1 Retinoid 4 (Neurotrophin inhibitor) (Neuro protein) (Foscore) 1e-10  
286-4 Probable G protein-coupled receptor ED-1 7e-32  
286-3 14-3-3 protein epsilon (Mitochondrial import stimulation factor L 1e-09  
801-1 Growth hormone inducible transmembrane protein (Dermal papilla 5e-66  
2808 Protein phosphatase 2A, regulatory subunit B (PP2A subunit) 2e-79  
24913 Ras-GTPase-activating protein binding protein 1 (GAP SH3-domain 2e-58  
788-1 Keratin, type I cytoskeletal 18 (Cytokeratin 18) (CK 18) e-101  
788-1 TUBULIN BETA 1 CHAIN 2e-43  
243-2 Tubulin beta 2 chain e-170  
243-6 Tubulin beta chain e-121  
243-5 TUBULIN BETA 4 CHAIN e-108  
505-1 TUBULIN ALPHA CHAIN e-117  
243-1 TUBULIN BETA 2 CHAIN (BETA-TUBULIN CLASS-II) e-141  
07m05 Profilin beta 2e-10  
113-1 Tubulin alpha-1 chain (Alpha-tubulin 1) 1e-74  
80-1 Myosin regulatory light chain 2, smooth muscle minor isoform (G1) 2e-87  
682-1 Cofilin, muscle isoform (Cofilin 2) 2e-69  
397-2 ARP2/3 complex 21 kDa subunit (P21-ARC) (Actin-related protein 2) 5e-93  
936-2 Unclassifiable EST  
25p17 Unclassifiable EST  
720-1 Unclassifiable EST  
2802 Unclassifiable EST  
6-2 Unclassifiable EST  
801-1 Unclassifiable EST  
0209 Unclassifiable EST  
2017 Unclassifiable EST  
765-1 (AF161463) HSP307 [Homo sapiens] 4e-64  
71-1 Dolichyl-diphosphooligosaccharide-protein glycosyltransferase 67 7e-42  
311-1 Dolichyl-diphosphooligosaccharide-protein glycosyltransferase 48 1e-66  
738-1 (BC048302) COP9 (constitutive photodemolition) subunit 1 e-108  
328-1 TRANSLUCON-ASSOCIATED PROTEIN, BETA SUBUNIT PRECURSOR (TRAP-BETA) 4e-58  
288-2 TRANSLUCON-ASSOCIATED PROTEIN, BETA SUBUNIT PRECURSOR (TRAP-BETA) 1e-82  
288-2 Unclassifiable EST  
20g23 Unclassifiable EST  
25f18 Unclassifiable EST  
547-1 Hypothetical protein F2327.5 in chromosome III 8e-37  
17c13 Unclassifiable EST  
2296 Unclassifiable EST  
1142-1 (AF28864) hypothetical protein SB8B [Homo sapiens] 1e-29  
1816 HYPOTHETICAL\_23.2\_KD PROTEIN IN DAL80-GAP1 INTERGENIC REGION 3e-09  
249-1 (NM\_114719) similar to RIKEN cDNA 2510000H06 gene [Homo sapiens] 2e-14  
4818 (NM\_011981) COP9 (constitutive photodemolition) subunit 3 e-14  
593-1 (NM\_014092) ART-4 protein [Homo sapiens] 1e-51  
19a18 (Y14314) IgE autoantigen [Homo sapiens] 1e-52  
759-1 (NM\_024295) hypothetical protein MGC3067 [Homo sapiens] 3e-96  
12924 Unclassifiable EST  
2018 Unclassifiable EST  
Hypothetical 31.8 kDa protein in chromosome II 2e-21  
510-1 Hypothetical 31.8 kDa protein in chromosome II 2e-39  
19c20 (NM\_021160) HLA-B associated transmembrane 5, B275 protein [Homo 3e-59  
12-2 Unclassifiable EST  
26a09 (NM\_135844) RIKEN cDNA 1500019M23 [Mus musculus] 5e-72  
20206 G10 PROTEIN 3e-71  
286-1 (NM\_005711) hypothetical protein MGC10924 similar to Nod54 5e-19  
690-1 Polyposis locus protein 1 (TBS2 protein) 9e-32  
1905 Unclassifiable EST  
20g12 Unclassifiable EST  
20f19 Unclassifiable EST  
23c24 Unclassifiable EST  
25o13 (AF151813) CGH-55 protein [Homo sapiens] 1e-17  
753-1 Unclassifiable EST  
21m09 Unclassifiable EST  
565-2 (NM\_024180) RIKEN cDNA 281040511 [Mus musculus] 5e-69  
595-1 Unclassifiable EST  
739-1 Basigin precursor (Blood-brain barrier HT7 antigen) (Neuheptin) 6e-20  
158-1 (AB018612) complement C3bC (Cytoma cytotoxic) 1e-14  
23818 Unclassifiable EST  
873-1 Bladder cancer-associated protein (Bladder cancer 10 kDa protein) 8e-48  
20m01 Latent transforming factor beta binding protein 1 precursor 7e-25  
280-1 Unclassifiable EST  
07m05 Unclassifiable EST  
2416 Unclassifiable EST  
125-1 CD9 antigen 7e-22  
719-1 Integral membrane protein 2B (Transmembrane protein E3-16) 1e-69  
24-1 Unclassifiable EST  
921-2 Hypothetical protein C32D5.9 in chromosome II 3e-49  
921-1 Hypothetical protein C32D5.9 in chromosome II 2e-52  
84-2 Hypothetical protein C32D5.9 in chromosome II 1e-15  
889-1 Unclassifiable EST  
164-1 (NM\_032122) hypothetical protein MGC11061 [Homo sapiens] 1e-80  
1066-1 Unclassifiable EST  
671-1 Hypothetical protein RT0E5.13 in chromosome III 3e-27  
534-1 (NM\_024296) chromosome 20 open reading frame 149 [Homo sapiens] 3e-20  
17p18 (AF14997) nucleoside Nap-43 [Homo sapiens] 5e-22  
1951-1 (NM\_136270) neural stem cell derived neuronal survival protein 1e-35  
0218 EPENDYMAL II PRECURSOR (EPD-II) 1e-19  
507-1 (NM\_132655) RIKEN cDNA 061039N19 [Mus musculus] 1e-42  
12c22 Unclassifiable EST  
2408 CYTOCHROME C OXIDASE ASSEMBLY PROTEIN COX15 3e-16  
2709 Unclassifiable EST  
936-1 Unclassifiable EST  
29c23 Unclassifiable EST  
535-3 Unclassifiable EST  
788-1 Unclassifiable EST  
446-1 Unclassifiable EST  
390-1 RNA-binding protein 5 (RNA binding motif protein 5) (Putative tumor 2e-36  
06m01 Eukaryotic initiation factor 4A-II (eIF-4A-II) (eIF4A-II) e-166  
28a20 Probable RNA-dependent helicase p72 (DGA-DNA protein p72) 8e-34  
0720 Transcription factor AP-1 (Activator protein 1) (AP1) 3e-34  
24c24 Unclassifiable EST  
271-2 Mesothoracic glutamate receptor 2 precursor 3e-89  
35068 47 kD HEAT SHOCK PROTEIN PRECURSOR (COLLAGEN-BINDING PROTEIN 1) e-133  
1218-1 Unclassifiable EST
