# Supplementary material
Source: PubMed Central journal article supplement (PMC534716)

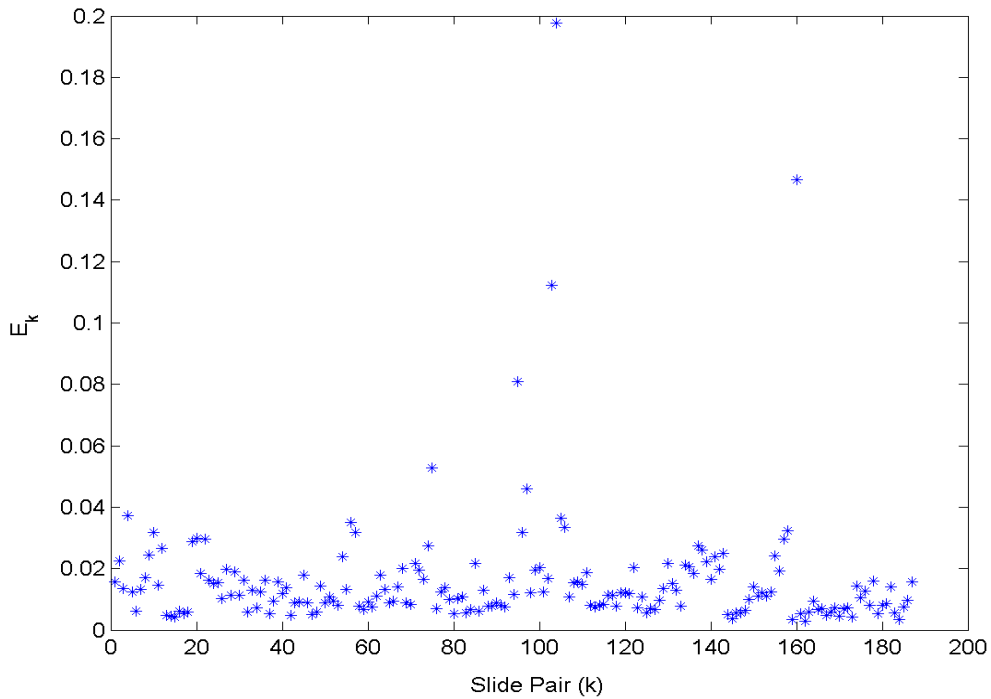

Supplement: pnas_101_48_16970__1.pdf [file pnas_101_48_16970__1.pdf]

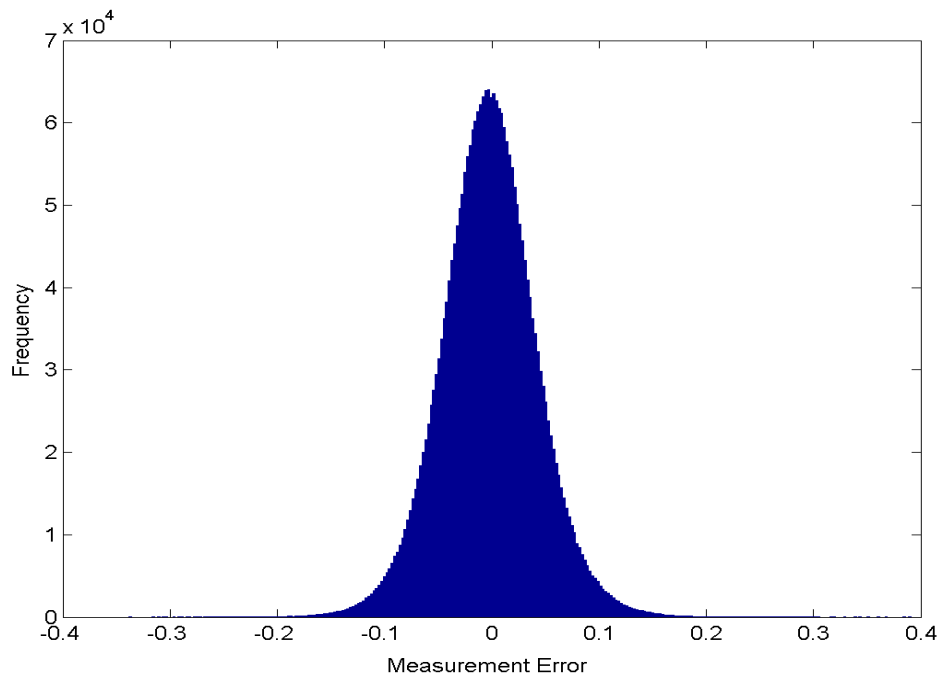

Supplement: pnas_101_48_16970__2.pdf [file pnas_101_48_16970__2.pdf]

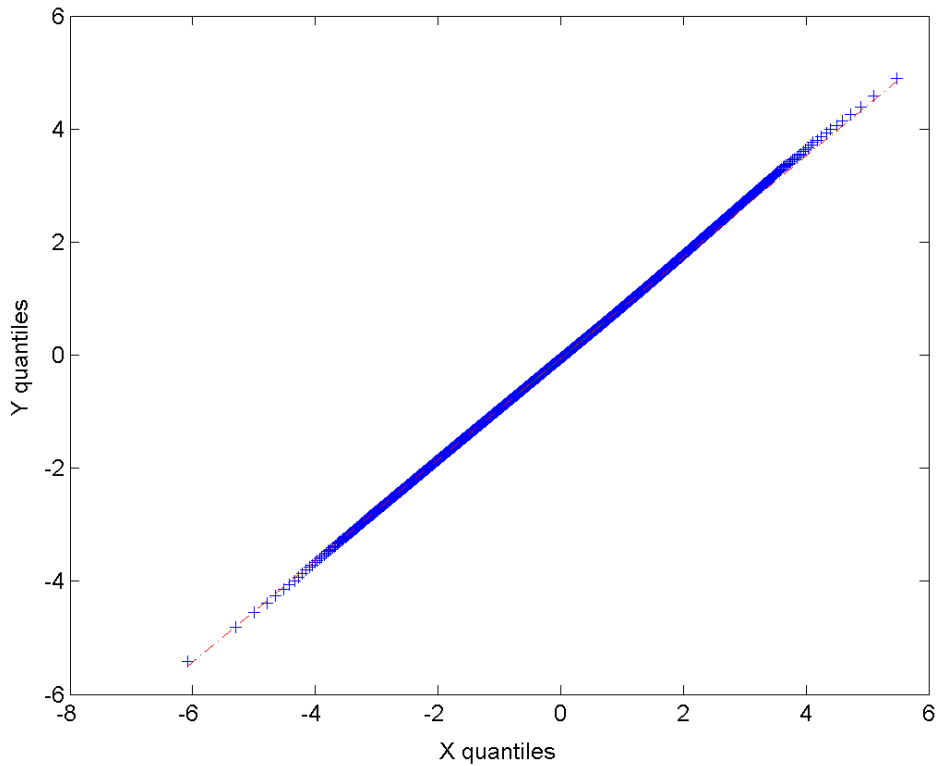

Supplement: pnas_101_48_16970__3.pdf [file pnas_101_48_16970__3.pdf]

## Glycolytic genes

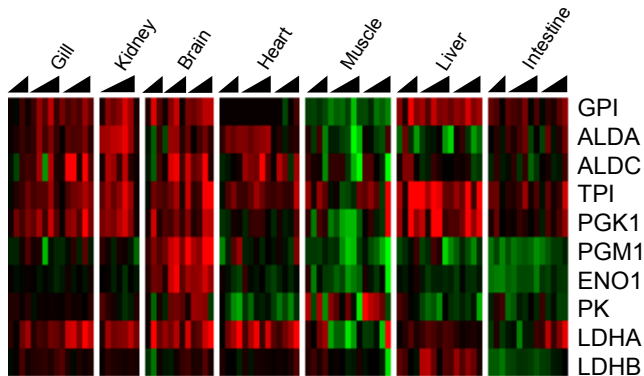

## Pentose phosphate shunt genes

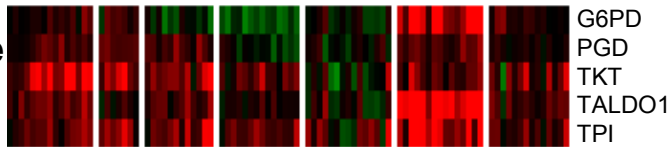

Supplement: pnas_101_48_16970__9.pdf [file pnas_101_48_16970__9.pdf]
